# Supplementary material
Source: Springer Nature journal article supplement (https://www.springermedizin.de/resource/supplementary/12876_2008_248_MOESM4_ESM.pdf/9439008)

### 24-hour Esophageal Acidity

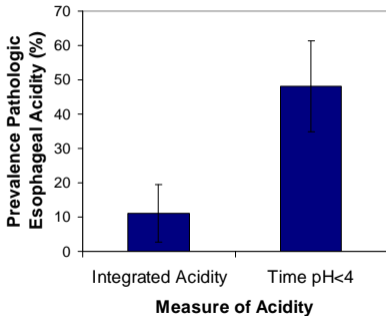

### Postprandial Esophageal Acidity

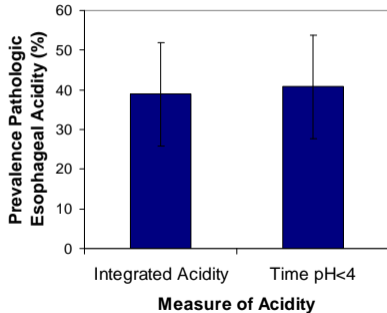

### Nocturnal Esophageal Acidity

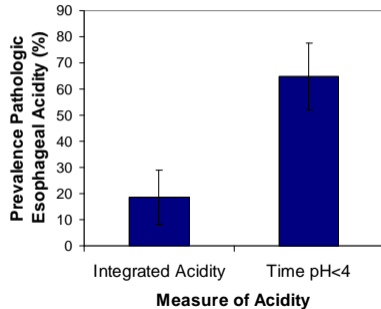

Supplement: MOESM4 [file 9439008]
